# Supplementary material for: Ultrathin sub-5 nm gate-all-around SiGe nanowire transistors with near-ideal subthreshold swing
Source: Royal Society of Chemistry journal article supplement (doi:10.1039/d5tc03710g), 2025-12-18
Supplement: d5tc03710g1.pdf [file d5tc03710g1.pdf]

## Supporting Information

### **Ultrathin Sub-5nm Gate-All-Around SiGe Nanowire Transistors with Near-Ideal Subthreshold Swing**

Guowei Zhang<sup>a</sup>, Yuang Guan<sup>a</sup>, Yee Sin Ang<sup>b</sup>, Shibo Fang<sup>b</sup>, Xiaoyi Lei<sup>a</sup>, Jinchang Liu<sup>a</sup>, Cong Shao<sup>a</sup>, Yang Dai<sup>a</sup>, Wu Zhao<sup>a</sup>, Junfeng Yan<sup>a</sup>, Jing Lu<sup>c\*</sup> and Han Zhang<sup>a\*</sup>

<sup>a</sup> School of Information Science and Technology, Northwest University, Xi'an 710127, P. R. China.

<sup>b</sup> Science, Mathematics and Technology (SMT) Cluster, Singapore University of Technology and Design, 487372, Singapore.

<sup>c</sup> State Key Laboratory for Mesoscopic Physics and Department of Physics, Peking University, Beijing 100871, P. R. China.

\*Corresponding author: Han Zhang ([hanzhang@nwu.edu.cn](mailto:hanzhang@nwu.edu.cn))

Jing Lu ([jinglu@pku.edu.cn](mailto:jinglu@pku.edu.cn))

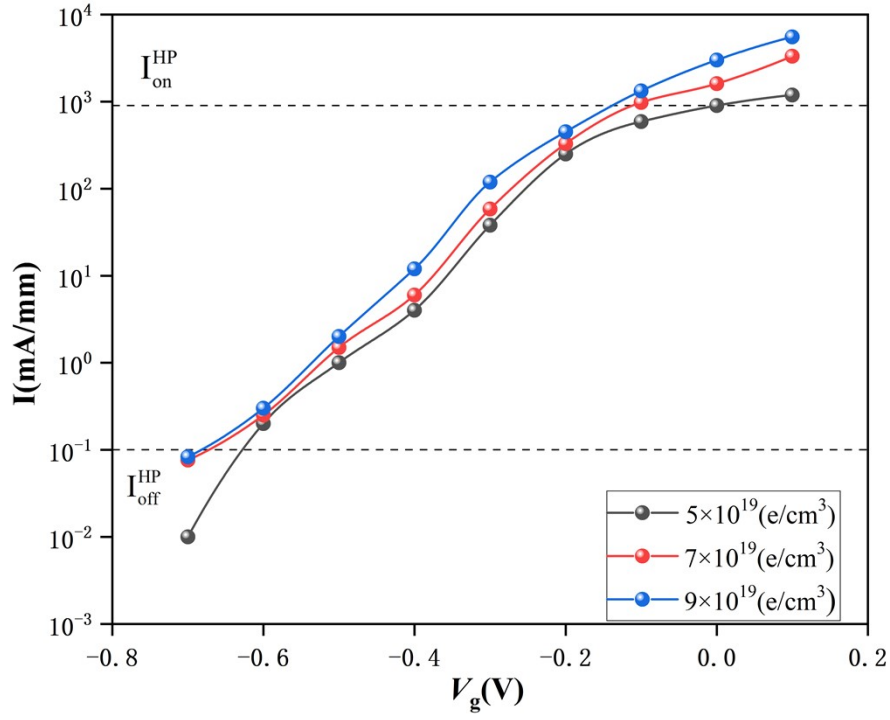

**Figure S1.** Transfer characteristics of the *n*-type GAA SiGe NW FETs with different electron doping concentrations ( $5 \times 10^{19}$ ,  $7 \times 10^{19}$ , and  $9 \times 10^{19}$   $e/\text{cm}^3$ ).

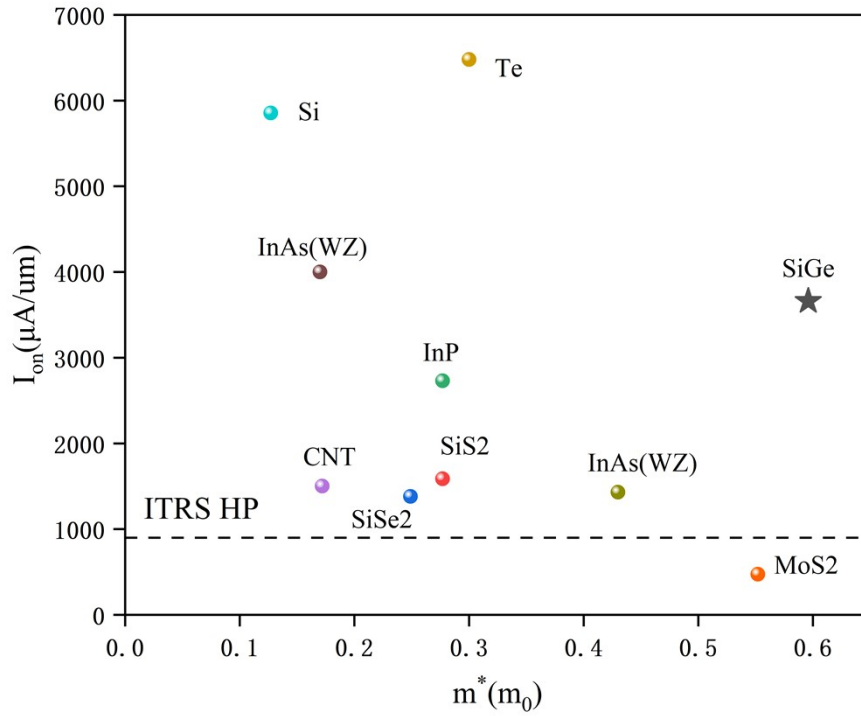

**Figure S2.** HP  $I_{\text{on}}$  of the low-dimensional material FETs at  $L_g = 5\text{nm}$  against  $m^*$  of the low-dimensional material.

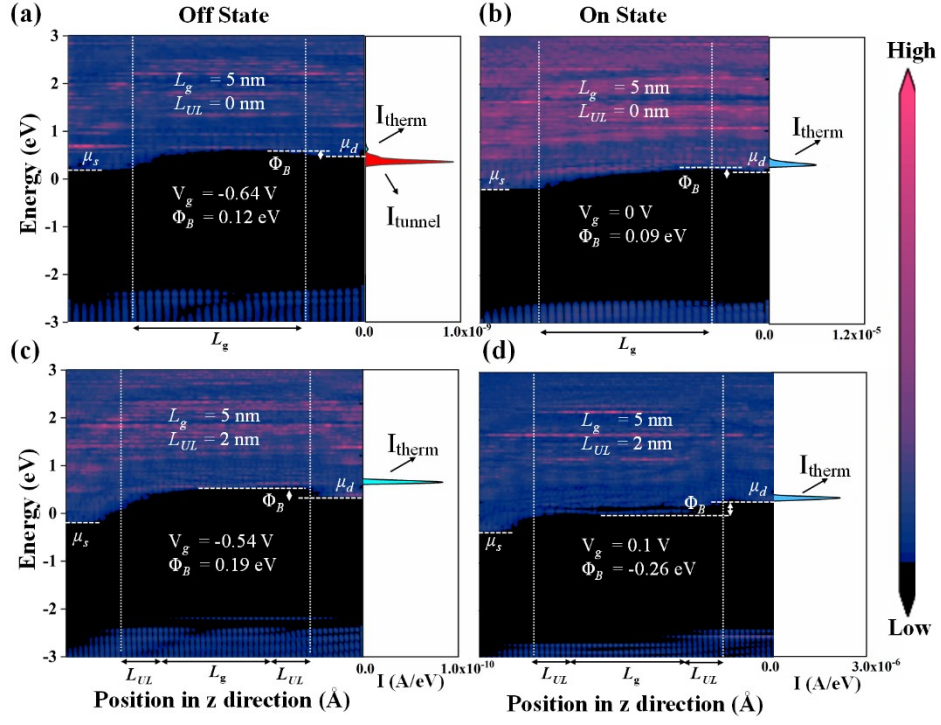

**Figure S3.** (a-d) Resolved LDDOS and the spectral current in the channel region of the 5 nm  $L_g$   $n$ -type GAA SiGe NW FETs with  $L_{UL} = 0$  and 2 nm at the off and on states for the HP applications.  $\mu_s$  and  $\mu_d$  are the chemical potential of the source and drain, respectively. The maximum hole barrier height  $\Phi_B$  is labeled.

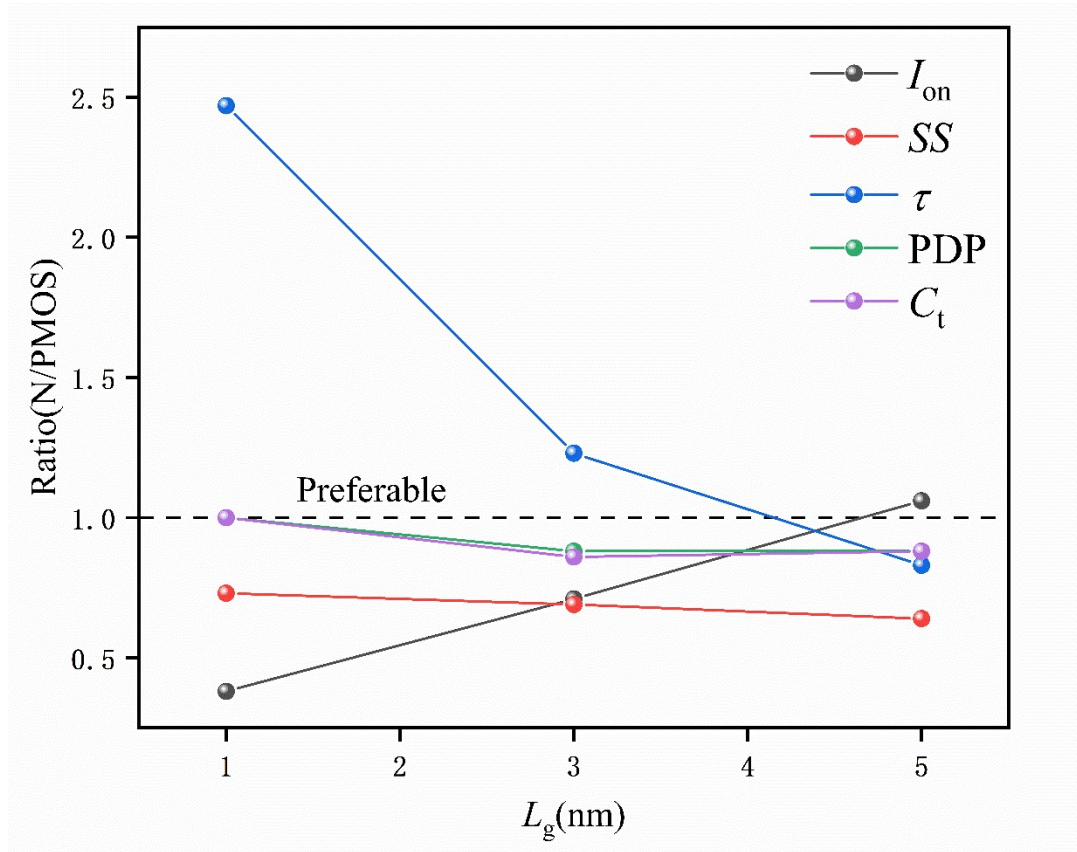

**Figure S4.** Ratios of  $I_{on}$ ,  $SS$ ,  $\tau$ ,  $PDP$ , and  $C_t$  for NMOS and PMOS at  $L_g = 1, 3$ , and  $5$  nm.
